# Supplementary material for: CUT&Tag for efficient epigenomic profiling of small samples and single cells
Source: Nat Commun. 2019 Apr 29;10:1930. doi: 10.1038/s41467-019-09982-5 (PMC6488672; doi:10.1038/s41467-019-09982-5)
Supplement: Supplementary file 3 — Reporting Summary [file 41467_2019_9982_MOESM3_ESM.pdf]

## Reporting Summary

Nature Research wishes to improve the reproducibility of the work that we publish. This form provides structure for consistency and transparency in reporting. For further information on Nature Research policies, see [Authors & Referees](#) and the [Editorial Policy Checklist](#).

### Statistics

For all statistical analyses, confirm that the following items are present in the figure legend, table legend, main text, or Methods section.

- |                                     |                                                                                                                                                                                                                                                                                                |
|-------------------------------------|------------------------------------------------------------------------------------------------------------------------------------------------------------------------------------------------------------------------------------------------------------------------------------------------|
| n/a                                 | Confirmed                                                                                                                                                                                                                                                                                      |
| <input type="checkbox"/>            | <input checked="" type="checkbox"/> The exact sample size ( $n$ ) for each experimental group/condition, given as a discrete number and unit of measurement                                                                                                                                    |
| <input type="checkbox"/>            | <input checked="" type="checkbox"/> A statement on whether measurements were taken from distinct samples or whether the same sample was measured repeatedly                                                                                                                                    |
| <input checked="" type="checkbox"/> | <input type="checkbox"/> The statistical test(s) used AND whether they are one- or two-sided<br><i>Only common tests should be described solely by name; describe more complex techniques in the Methods section.</i>                                                                          |
| <input checked="" type="checkbox"/> | <input type="checkbox"/> A description of all covariates tested                                                                                                                                                                                                                                |
| <input type="checkbox"/>            | <input checked="" type="checkbox"/> A description of any assumptions or corrections, such as tests of normality and adjustment for multiple comparisons                                                                                                                                        |
| <input type="checkbox"/>            | <input checked="" type="checkbox"/> A full description of the statistical parameters including central tendency (e.g. means) or other basic estimates (e.g. regression coefficient) AND variation (e.g. standard deviation) or associated estimates of uncertainty (e.g. confidence intervals) |
| <input checked="" type="checkbox"/> | <input type="checkbox"/> For null hypothesis testing, the test statistic (e.g. $F$ , $t$ , $r$ ) with confidence intervals, effect sizes, degrees of freedom and $P$ value noted<br><i>Give <math>P</math> values as exact values whenever suitable.</i>                                       |
| <input checked="" type="checkbox"/> | <input type="checkbox"/> For Bayesian analysis, information on the choice of priors and Markov chain Monte Carlo settings                                                                                                                                                                      |
| <input checked="" type="checkbox"/> | <input type="checkbox"/> For hierarchical and complex designs, identification of the appropriate level for tests and full reporting of outcomes                                                                                                                                                |
| <input type="checkbox"/>            | <input checked="" type="checkbox"/> Estimates of effect sizes (e.g. Cohen's $d$ , Pearson's $r$ ), indicating how they were calculated                                                                                                                                                         |

*Our web collection on [statistics for biologists](#) contains articles on many of the points above.*

### Software and code

Policy information about [availability of computer code](#)

Data collection Detailed in the manuscript

Data analysis Detailed in the manuscript

For manuscripts utilizing custom algorithms or software that are central to the research but not yet described in published literature, software must be made available to editors/reviewers. We strongly encourage code deposition in a community repository (e.g. GitHub). See the Nature Research [guidelines for submitting code & software](#) for further information.

### Data

Policy information about [availability of data](#)

All manuscripts must include a [data availability statement](#). This statement should provide the following information, where applicable:

- Accession codes, unique identifiers, or web links for publicly available datasets
- A list of figures that have associated raw data
- A description of any restrictions on data availability

Data availability. All sequencing data has been deposited in GEO, and will be made public upon acceptance.

For review, the following link allows reviewer access to all data files at GEO: <https://www.ncbi.nlm.nih.gov/geo/query/acc.cgi?acc=GSE124557>  
enter token mxmpcimsldyvmzmp into the box.

## Field-specific reporting

Please select the one below that is the best fit for your research. If you are not sure, read the appropriate sections before making your selection.

☒ Life sciences ☐ Behavioural & social sciences ☐ Ecological, evolutionary & environmental sciences

For a reference copy of the document with all sections, see [nature.com/documents/nr-reporting-summary-flat.pdf](https://www.nature.com/documents/nr-reporting-summary-flat.pdf)

## Life sciences study design

All studies must disclose on these points even when the disclosure is negative.

|                 |                                                                                      |
|-----------------|--------------------------------------------------------------------------------------|
| Sample size     | n/a                                                                                  |
| Data exclusions | Sequencing reads mapping to the mitochondrial genome were removed from all datasets. |
| Replication     | At least 2 biological replicates were profiled.                                      |
| Randomization   | n/a                                                                                  |
| Blinding        | n/a                                                                                  |

## Reporting for specific materials, systems and methods

We require information from authors about some types of materials, experimental systems and methods used in many studies. Here, indicate whether each material, system or method listed is relevant to your study. If you are not sure if a list item applies to your research, read the appropriate section before selecting a response.

### Materials & experimental systems

|                                     |                                                           |
|-------------------------------------|-----------------------------------------------------------|
| n/a                                 | Involved in the study                                     |
| <input type="checkbox"/>            | <input checked="" type="checkbox"/> Antibodies            |
| <input type="checkbox"/>            | <input checked="" type="checkbox"/> Eukaryotic cell lines |
| <input checked="" type="checkbox"/> | <input type="checkbox"/> Palaeontology                    |
| <input checked="" type="checkbox"/> | <input type="checkbox"/> Animals and other organisms      |
| <input checked="" type="checkbox"/> | <input type="checkbox"/> Human research participants      |
| <input checked="" type="checkbox"/> | <input type="checkbox"/> Clinical data                    |

### Methods

|                                     |                                                 |
|-------------------------------------|-------------------------------------------------|
| n/a                                 | Involved in the study                           |
| <input type="checkbox"/>            | <input checked="" type="checkbox"/> ChIP-seq    |
| <input checked="" type="checkbox"/> | <input type="checkbox"/> Flow cytometry         |
| <input checked="" type="checkbox"/> | <input type="checkbox"/> MRI-based neuroimaging |

## Antibodies

|                 |                                                                                                                                                                 |
|-----------------|-----------------------------------------------------------------------------------------------------------------------------------------------------------------|
| Antibodies used | All antibodies and suppliers are listed in the Methods: Biological materials section                                                                            |
| Validation      | All antibodies are commercially available, and have been verified by Western blotting or by peptide ELISA described on the manufacturer's specification sheets. |

## Eukaryotic cell lines

Policy information about [cell lines](#)

|                                                                      |                                                        |
|----------------------------------------------------------------------|--------------------------------------------------------|
| Cell line source(s)                                                  | K562: ATCC, catalog# CCL-243. H1: WiCell WA01-WB35186. |
| Authentication                                                       | none were authenticated.                               |
| Mycoplasma contamination                                             | Negative for mycoplasma                                |
| Commonly misidentified lines<br>(See <a href="#">ICLAC</a> register) | n/a                                                    |

## ChIP-seq

## Data deposition

- ☒ Confirm that both raw and final processed data have been deposited in a public database such as [GEO](#).
- ☒ Confirm that you have deposited or provided access to graph files (e.g. BED files) for the called peaks.

## Data access links

*May remain private before publication.*

Reviewer access link: <https://www.ncbi.nlm.nih.gov/geo/query/acc.cgi?acc=GSE124557>  
then type token mxmpcimsldyvmz into the box.

## Files in database submission

GSM3536497 H1\_K27ac\_(20180919\_HK\_Hs\_H1I\_K27ac\_0912)  
GSM3536498 H1\_K27me3\_(20180919\_HK\_Hs\_H1I\_K27me3\_0912)  
GSM3536499 H1\_K4me1\_(20180919\_HK\_Hs\_H1I\_K4me1\_0912)  
GSM3536500 H1\_K4me2\_(20180919\_HK\_Hs\_H1I\_K4me2\_0912)  
GSM3536501 H1\_K4me3\_(20180919\_HK\_Hs\_H1I\_K4me3\_0912)  
GSM3536502 H1\_PolSer25P\_(20180919\_HK\_Hs\_H1I\_PolSer25P\_0912)  
GSM3536503 H1\_PolSer2P\_(20180919\_HK\_Hs\_H1I\_PolSer2P\_0912)  
GSM3536504 H1\_PolSer5P\_(20180919\_HK\_Hs\_H1I\_PolSer5P\_0912)  
GSM3536505 H1\_PolSer7P\_(20180919\_HK\_Hs\_H1I\_PolSer7P\_0912)  
GSM3536506 H1\_Sox2\_(20180919\_HK\_Hs\_H1I\_Sox2\_0912)  
GSM3536507 K562\_H3K27me3\_200\_(20180919\_HK\_Hs\_K5I\_K27me8\_200\_0912)  
GSM3536508 K562\_H3K27me3\_20k\_(20180919\_HK\_Hs\_K5I\_K27me4\_20k\_0912)  
GSM3536509 K562\_H3K27me3\_2k\_(20180919\_HK\_Hs\_K5I\_K27me6\_2k\_0912)  
GSM3536510 K562\_H3K27me3\_600\_(20180919\_HK\_Hs\_K5I\_K27me7\_600\_0912)  
GSM3536511 K562\_H3K27me3\_60k\_(20180919\_HK\_Hs\_K5I\_K27me3\_60k\_0912)  
GSM3536512 K562\_H3K27me3\_60\_(20180919\_HK\_Hs\_K5I\_K27me9\_60\_0912)  
GSM3536513 K562\_H3K27me3\_6k\_(20180919\_HK\_Hs\_K5I\_K27me5\_6k\_0912)  
GSM3536514 K562\_K27ac\_(20180919\_HK\_Hs\_K5I\_K27ac\_0912)  
GSM3536515 K562\_K27me3\_(20180919\_HK\_Hs\_K5I\_K27me3\_0912)  
GSM3536516 K562\_K4me1\_(20180919\_HK\_Hs\_K5I\_K4me1\_0912)  
GSM3536517 K562\_K4me2\_(20180919\_HK\_Hs\_K5I\_K4me2\_0912)  
GSM3536518 K562\_K4me3\_(20180919\_HK\_Hs\_K5I\_K4me3\_0912)  
GSM3536519 K562\_NPAT\_(20181120\_HK\_Hs\_K5I\_NPAT\_0912)  
GSM3536520 K562\_PolSer25P\_(20180919\_HK\_Hs\_K5I\_PolSer25P\_0912)  
GSM3536521 K562\_PolSer2P\_(20180919\_HK\_Hs\_K5I\_PolSer2P\_0912)  
GSM3536522 K562\_PolSer5P\_(20180919\_HK\_Hs\_K5I\_PolSer5P\_0912)  
GSM3536523 K562\_PolSer7P\_(20180919\_HK\_Hs\_K5I\_PolSer7P\_0912)  
GSM3560256 H1\_IgG\_(20180919\_HK\_Hs\_H1\_IgG\_0912)  
GSM3560257 K562\_CTCF\_150mM\_(20190104\_SH\_Hs\_C15\_20181224,6)  
GSM3560258 K562\_CTCF\_300mM\_(20190104\_SH\_Hs\_C30\_20181224,6)  
GSM3560259 K562\_CTCF\_500mM\_(20190104\_SH\_Hs\_C50\_20181224,6)  
GSM3560260 K562\_H2AZ\_(20180919\_HK\_Hs\_K5\_H2AZ\_0912)  
GSM3560261 K562\_H3K27me3\_(20190104\_SH\_Hs\_M30\_20181224)  
GSM3560262 K562\_H3K9ac\_(20190104\_SH\_Hs\_H91,2\_181227)  
GSM3560263 K562\_H4Kac\_(20190104\_SH\_Hs\_H41\_20181227)  
GSM3560264 K562\_IgG\_(20180919\_HK\_Hs\_K5\_IgG\_0912)  
GSM3560265 K562\_NPAT\_(20180919\_HK\_Hs\_K5\_NPAT\_0912)  
GSM3680214 K562\_CTCF\_(20180919\_HK\_Hs\_K5\_CTCF\_0912)  
GSM3680215 K562\_H3K27me3\_CST9733\_10d-RT\_1000th\_(20190227\_SH\_Hs\_me3B8\_20190217)  
GSM3680216 K562\_H3K27me3\_CST9733\_10d-RT\_125th\_(20190227\_SH\_Hs\_me3B1\_20190217)  
GSM3680217 K562\_H3K27me3\_CST9733\_10d-RT\_250th\_(20190227\_SH\_Hs\_me3B2\_20190217)  
GSM3680218 K562\_H3K27me3\_CST9733\_10d-RT\_500th\_(20190227\_SH\_Hs\_me3B4\_20190217)  
GSM3680219 K562\_H3K27me3\_CST9733\_fresh\_1000th\_(20190227\_SH\_Hs\_me3A8\_20190217)  
GSM3680220 K562\_H3K27me3\_CST9733\_fresh\_125th\_(20190227\_SH\_Hs\_me3A1\_20190217)  
GSM3680221 K562\_H3K27me3\_CST9733\_fresh\_250th\_(20190227\_SH\_Hs\_me3A2\_20190217)  
GSM3680222 K562\_H3K27me3\_CST9733\_fresh\_500th\_(20190227\_SH\_Hs\_me3A4\_20190217)  
GSM3680223 K562\_H3K4me1\_Abcam\_8895\_(20180810\_SH\_Hs\_H3K4me1\_0806)  
GSM3680224 K562\_H3K4me1\_ActMot\_39113\_(20180817\_SH\_Hs\_7\_H2AZ\_0816)  
GSM3680225 K562\_H3K4me2\_Upstate\_07-030\_(20180817\_SH\_Hs\_11\_K4me2\_0816)  
GSM3680226 K562\_H3K4me3\_Abcam\_ab8580\_(20180817\_SH\_Hs\_12\_K4me3\_0816)  
GSM3680227 K562\_IgG\_ABIN101961\_(20190104\_SH\_Hs\_IgG\_20181224)  
GSM3680228 K562\_NPAT\_Thermo-PA5-66839\_10d-RT\_1000th\_(20190227\_SH\_Hs\_NPB8\_20190217)  
GSM3680229 K562\_NPAT\_Thermo-PA5-66839\_10d-RT\_125th\_(20190227\_SH\_Hs\_NPB1\_20190217)  
GSM3680230 K562\_NPAT\_Thermo-PA5-66839\_10d-RT\_250th\_(20190227\_SH\_Hs\_NPB2\_20190217)  
GSM3680231 K562\_NPAT\_Thermo-PA5-66839\_10d-RT\_500th\_(20190227\_SH\_Hs\_NPB4\_20190217)  
GSM3680232 K562\_NPAT\_Thermo-PA5-66839\_fresh\_1000th\_(20190227\_SH\_Hs\_NPA8\_20190217)  
GSM3680233 K562\_NPAT\_Thermo-PA5-66839\_fresh\_125th\_(20190227\_SH\_Hs\_NPA1\_20190217)  
GSM3680234 K562\_NPAT\_Thermo-PA5-66839\_fresh\_250th\_(20190227\_SH\_Hs\_NPA2\_20190217)  
GSM3680235 K562\_NPAT\_Thermo-PA5-66839\_fresh\_500th\_(20190227\_SH\_Hs\_NPA4\_20190217)

Genome browser session  
(e.g. [UCSC](#))

n/a

Methodology

|                         |                                                                                                |
|-------------------------|------------------------------------------------------------------------------------------------|
| Replicates              | At least 2 replicates were performed. Comparative analysis is the topic of this manuscript.    |
| Sequencing depth        | All Experiments were paired-end. Sequencing depths and sampling is reported in the manuscript. |
| Antibodies              | All antibodies and sources are provided in the Methods section.                                |
| Peak calling parameters | Parameters are specified in the Methods section.                                               |
| Data quality            | Data quality assessment is the topic of this manuscript, and is reported.                      |
| Software                | A link to custom code is provided in the Methods section.                                      |
